# Supplementary material for: COVID-19 Vaccines and Autoimmune Hematologic Disorders
Source: MDPI journal article supplement (doi:10.3390/vaccines10060961), 2022-06-16
Supplement: s1 [file s1]

**Supplementary Table S1. Categories SARS-CoV-2 vaccines that successfully passed phase III trials belong to**

| <b>Type of vaccine</b>                     | <b>Product name</b>                                                                                                |
|--------------------------------------------|--------------------------------------------------------------------------------------------------------------------|
| <b>Inactivated virus</b>                   | NVX-COV2373, CoronaVac, BBIBP-CorV, Wuhan Sinopharm inactivated vaccine, Covaxin, QazVac, KoviVac, COVIran Barekat |
| <b>Protein encoding mRNA</b>               | BNT162b2*, mRNA-1273*, CVnCoV                                                                                      |
| <b>Protein encoding plasmid DNA vector</b> | INO-4800, AG0301-COVID19, ZyCoV-D, GX-19, ZyCoV-D, bacTLR-Spike, CORVax12                                          |
| <b>Protein encoding viral vector</b>       | AZD1222, Sputnik V, Sputnik V Light, Ad5-nCoV (Convdecia), Ad26.COVS.2                                             |
| <b>Protein/polysaccharides</b>             | EpiVacCorona, ZF2001, Abdala                                                                                       |

\*First authorized SARS-CoV-2 mRNA-based vaccines.
